# Supplementary material for: A diversity centric strategy for the selection of spatio-temporal training data for LSTM-based streamflow forecasting
Source: Copernicus journal article supplement (doi:10.5194/hess-2024-169), 2024-06-14
Supplement: Supplementary file [file hess-2024-169-AC1-supplement.pdf]

## Supplementary information for RC1 response.

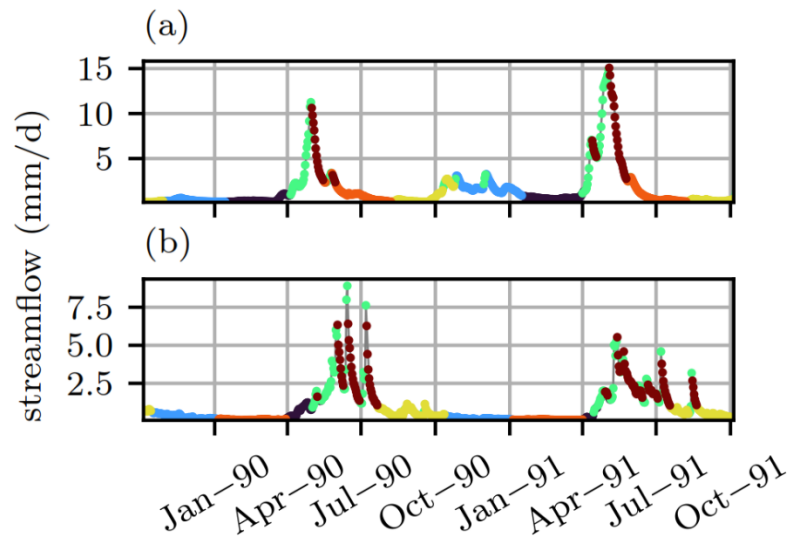

**Figure RC1a: Revised Figure 3 with reduced marker size.**

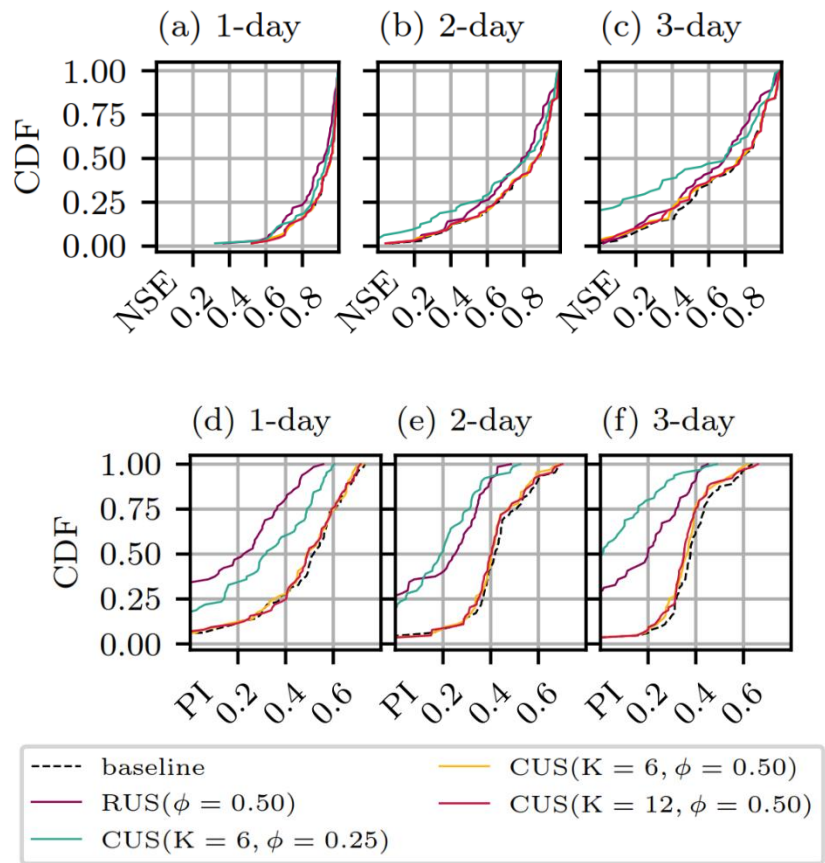

**Figure RC1b: revised Figure 4 with reduced linewidths.**

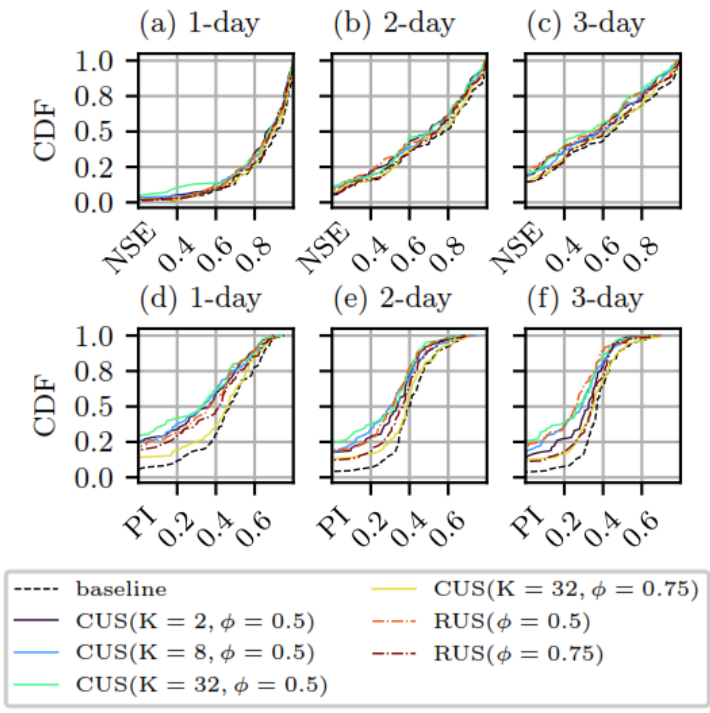

**Figure RC1c: revised Figure 5 with reduced linewidths.**
