# Supplementary material for: A diversity centric strategy for the selection of spatio-temporal training data for LSTM-based streamflow forecasting
Source: Copernicus journal article supplement (doi:10.5194/hess-2024-169), 2024-06-14
Supplement: Supplementary file [file hess-2024-169-AC2-supplement.pdf]

## Supplementary information for RC2 response.

### Runtimes for experiments 1a and 1b

Runs were performed on a workstation with an AMD Ryzen 5600G (CPU learning) and 32GB DDR4 RAM.

**Table S2.** Runtimes for experiment 1a: cluster-based temporal undersampling. The symbol '-' denotes a compromised runtime calculation.

| configuration                         | run duration (minutes) |
|---------------------------------------|------------------------|
| baseline                              | 116.37                 |
| CUS <sub>Q</sub> (K=12, $\phi=0.50$ ) | -                      |
| CUS <sub>Q</sub> (K=6, $\phi=0.25$ )  | 37.70                  |
| CUS <sub>Q</sub> (K=6, $\phi=0.50$ )  | 73.33                  |
| RUS ( $\phi=0.25$ )                   | 57.55                  |
| RUS ( $\phi=0.50$ )                   | 62.68                  |

### Table RC2a: runtimes for experiment 2a.

**Table S3.** Runtimes for experiment 1b: cluster-based spatial undersampling. The symbol '-' denotes a compromised runtime calculation.

| configuration                 | run duration (minutes) |
|-------------------------------|------------------------|
| baseline                      | 176.65                 |
| CUS <sub>B</sub> (K=2, B=64)  | 94.60                  |
| CUS <sub>B</sub> (K=32, B=64) | 76.33                  |
| CUS <sub>B</sub> (K=32, B=96) | 108.95                 |
| CUS <sub>B</sub> (K=8, B=64)  | 90.75                  |
| RUS (B=64)                    | 66.43                  |
| RUS (B=96)                    | -                      |

### Table RC2b: runtimes for experiment 2b.

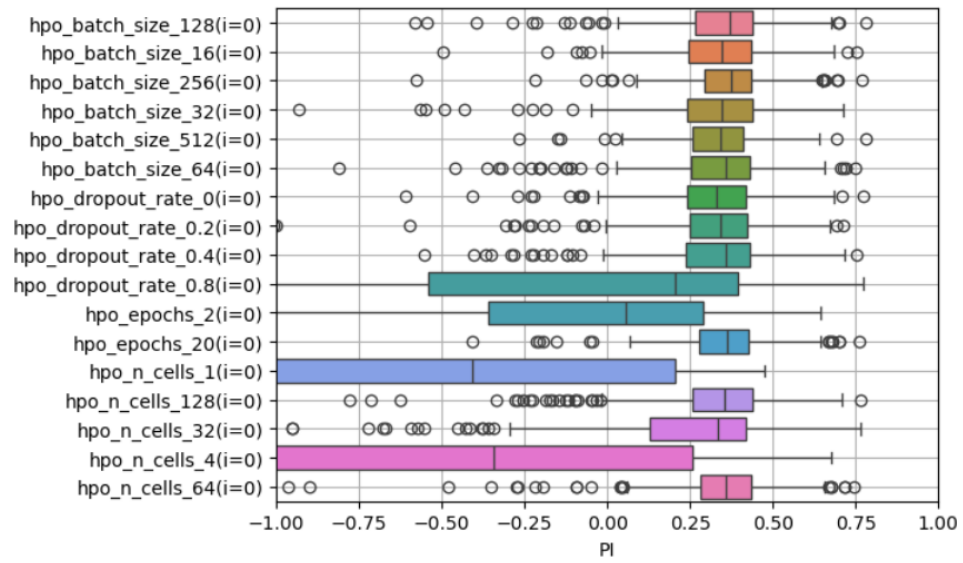

**FigureRC2a: Hyperparameter optimisation results in terms of PI performance on the validation dataset.**

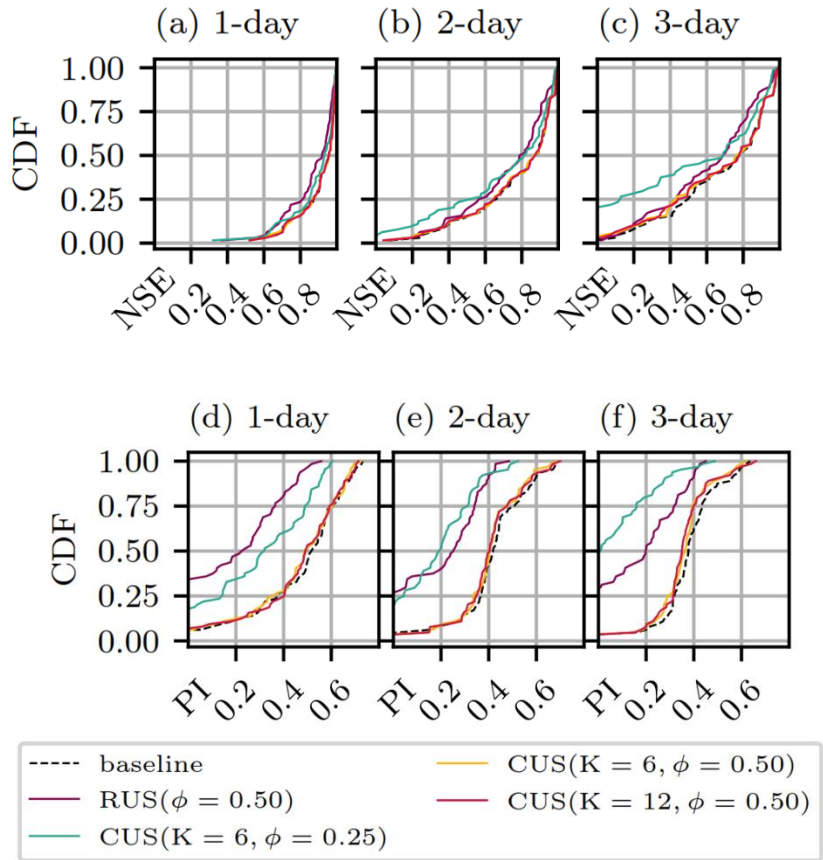

**Figure RC2b: revised Figure 4 with reduced linewidths.**

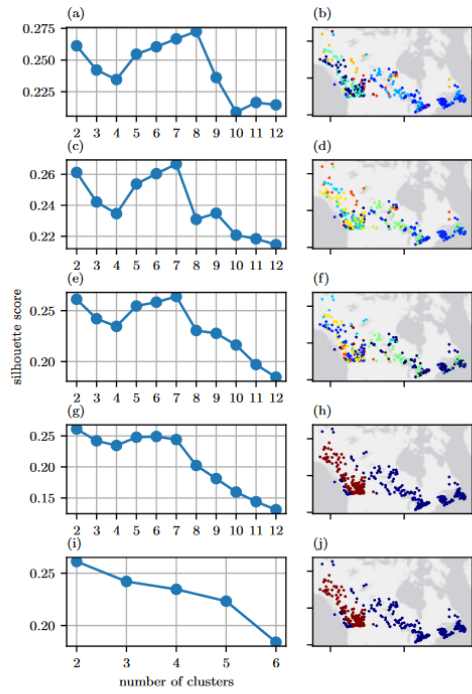

Figure S1. Silhouette scores (left) for minimum cluster sizes of 2 (a), 8 (c), 16 (e), 32 (g), and 64 (i). Respective clustering results (right) for K values (corresponding to maximum silhouette score) of 8 (b), 7 (d, f), and 2 (h, j). World Gray Canvas basemap provided by ESRI.

**Figure RC2c: Relationship between silhouette score and minimum cluster size.**

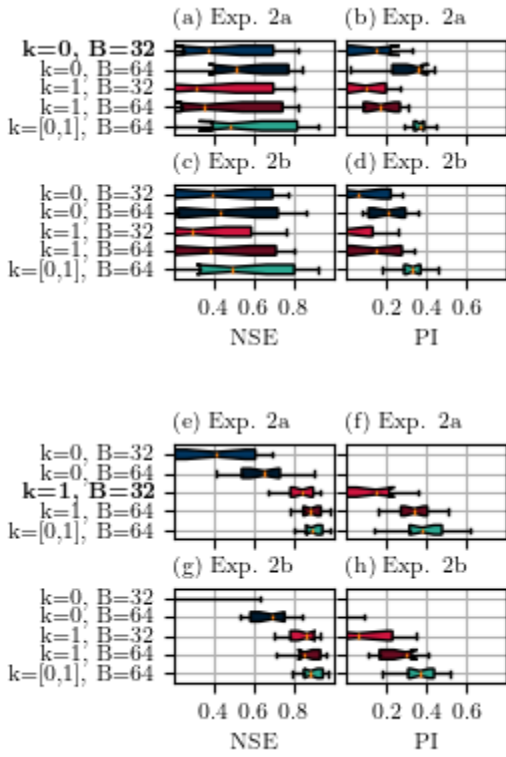

**Figure RC2d: Updated Figure 10 with an increased number of subplots and detailed subplot titles.**

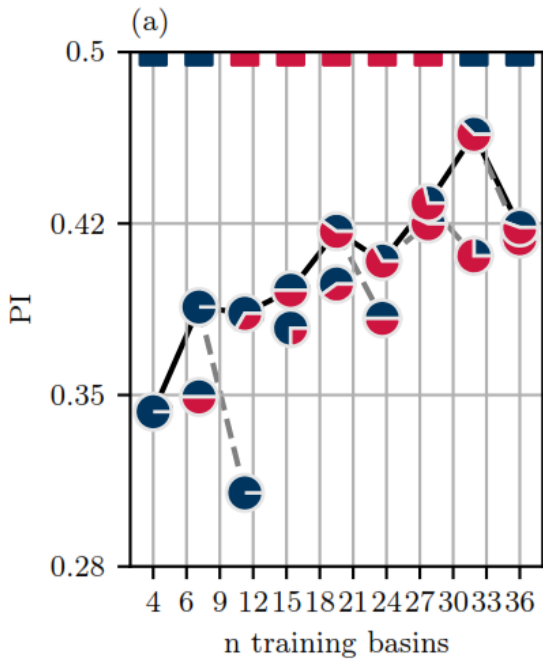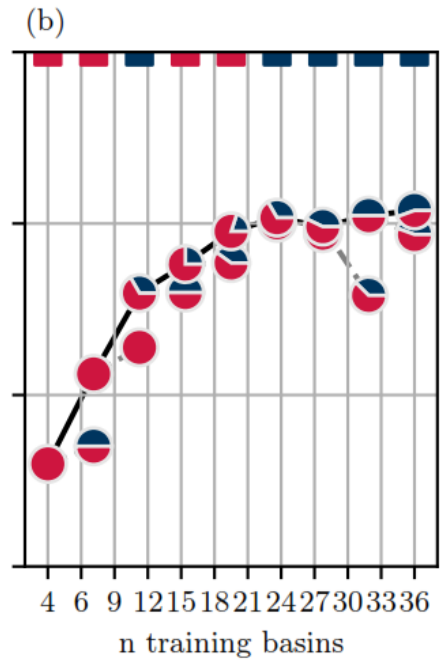

**Figure RC2e: Original experimental results.**

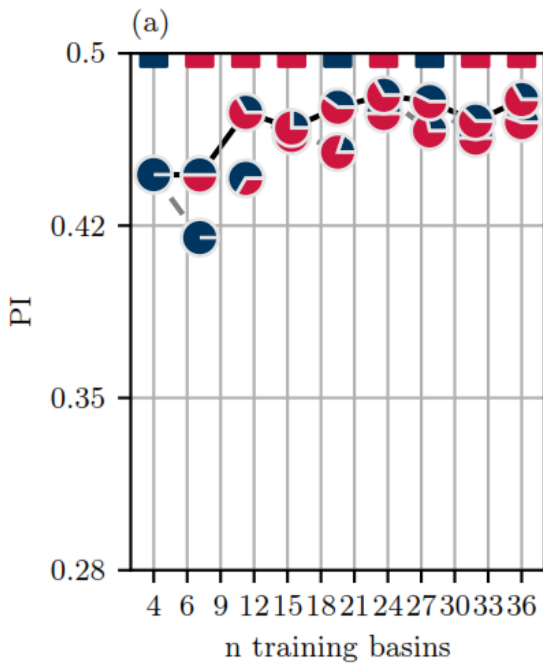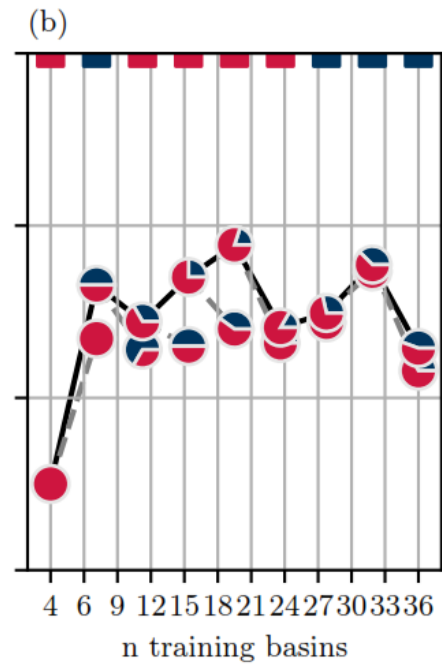

**Figure RC2f: Additional experimental run on two sets of 4 different basins**
